# Supplementary material for: Energy-efficient border intrusion detection using wireless sensors network
Source: Springer Nature journal article supplement (doi:10.1186/1687-1499-2014-46), 2014-03-25
Supplement: 13638_2013_888_MOESM2_ESM.pdf [file 13638_2013_888_MOESM2_ESM.pdf]

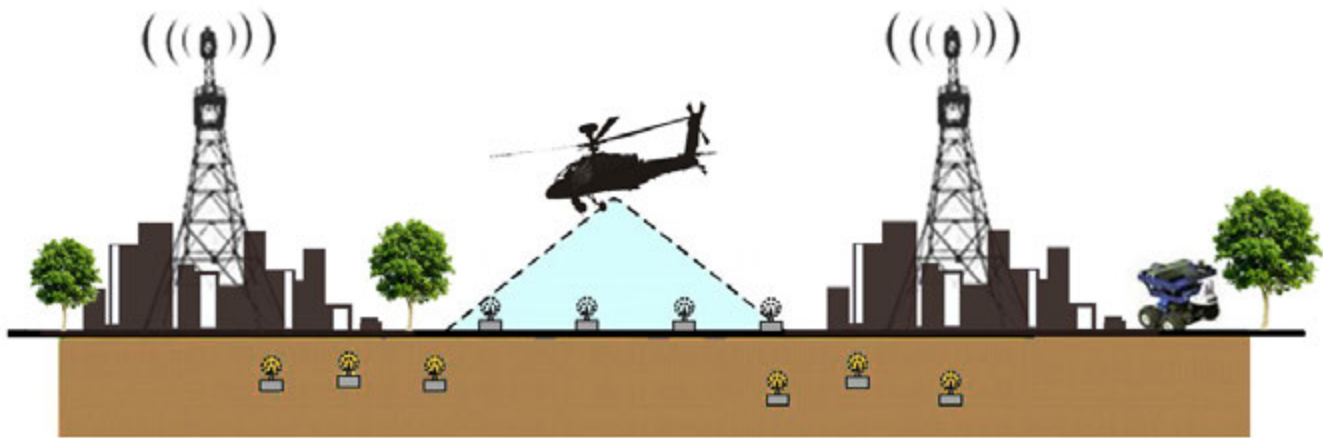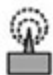

*fixed sensor*

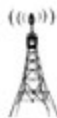

*Sensor tower*

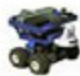

*mobile sensor*

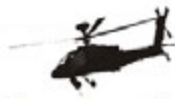

*information collection*
