# Supplementary material for: Energy-efficient border intrusion detection using wireless sensors network
Source: Springer Nature journal article supplement (doi:10.1186/1687-1499-2014-46), 2014-03-25

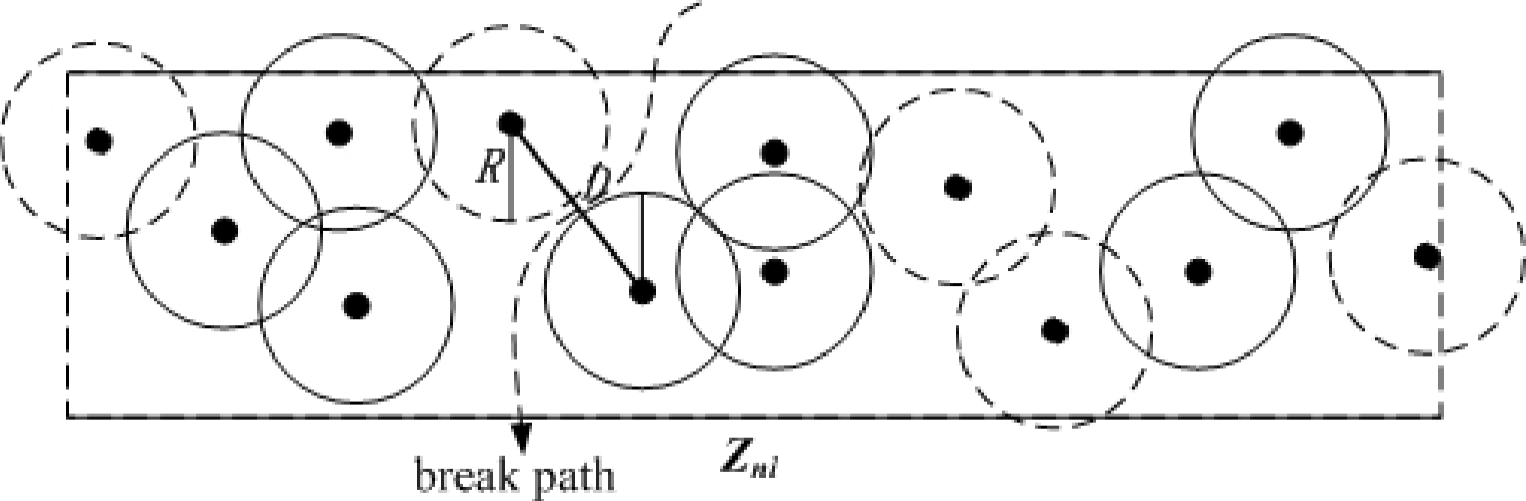

Supplement: 13638_2013_888_MOESM9_ESM.pdf [file 13638_2013_888_MOESM9_ESM.pdf]
