# Supplementary material for: Energy-efficient border intrusion detection using wireless sensors network
Source: Springer Nature journal article supplement (doi:10.1186/1687-1499-2014-46), 2014-03-25

$b_1$

$b_2$

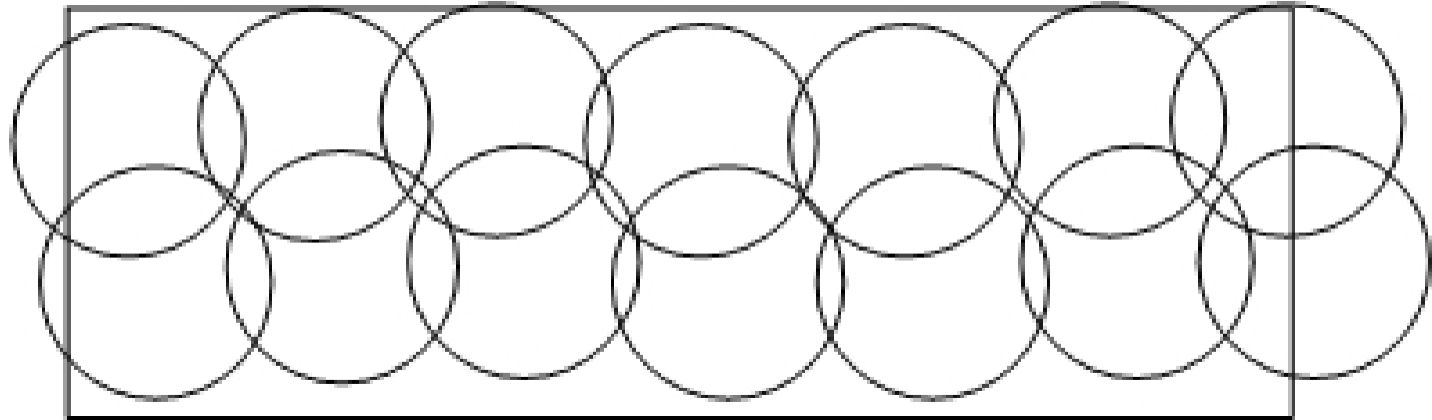

Supplement: 13638_2013_888_MOESM14_ESM.pdf [file 13638_2013_888_MOESM14_ESM.pdf]
